# Supplementary material for: Accelerating materials property predictions using machine learning
Source: PubMed Central journal article supplement (PMC3786293; doi:10.1038/srep02810), 2013-09-30
Supplement: srep02810-s1.pdf [file srep02810-s1.pdf]

# Supporting Information for

## Accelerating materials property predictions using machine learning

G. Pilia, C. C. Wang, X. Jiang, S. Rajasekaran, R. Ramprasad\*

E-mail: rampi@uconn.edu

Table 1: The DFT computed atomization energies, formation energies,  $c$  lattice parameters, spring constants, electron affinities, bandgaps, and dielectric permittivities, both electronic ( $\epsilon_e^c$ ) and total ( $\epsilon_{tot}^c$ ) along the chain axis, for the 175 symmetry unique 4-unit polymeric systems. DFT total energies of bulk C, Si, Ge and Sn as well as H<sub>2</sub>, F<sub>2</sub> and Cl<sub>2</sub> gas phase molecules were used as a reference to compute the reported formation energies.

| S. No. | Systems<br>Composition                                              | Atomization<br>Eng. (eV) | Formation<br>Eng. (eV) | $c$<br>(Å) | Spring<br>Const. (N/m) | Electron<br>Affinity (eV) | Bandgap<br>(eV) | $\epsilon_e^c$ | $\epsilon_{tot}^c$ |
|--------|---------------------------------------------------------------------|--------------------------|------------------------|------------|------------------------|---------------------------|-----------------|----------------|--------------------|
| 1      | CH <sub>2</sub> CH <sub>2</sub> CH <sub>2</sub> CH <sub>2</sub>     | -16.332                  | -2.793                 | 5.121      | 119.388                | 0.574                     | 6.393           | 2.502          | 2.502              |
| 2      | CH <sub>2</sub> CH <sub>2</sub> CH <sub>2</sub> GeF <sub>2</sub>    | -15.639                  | -7.997                 | 5.919      | 86.598                 | 1.490                     | 5.421           | 2.787          | 4.009              |
| 3      | CH <sub>2</sub> CH <sub>2</sub> CH <sub>2</sub> GeCl <sub>2</sub>   | -14.443                  | -3.076                 | 6.730      | 52.523                 | 3.272                     | 3.366           | 2.467          | 3.600              |
| 4      | CH <sub>2</sub> CH <sub>2</sub> CH <sub>2</sub> SiF <sub>2</sub>    | -16.447                  | -10.299                | 5.713      | 96.803                 | 0.936                     | 5.778           | 2.517          | 3.147              |
| 5      | CH <sub>2</sub> CH <sub>2</sub> CH <sub>2</sub> SiCl <sub>2</sub>   | -15.302                  | -5.586                 | 5.735      | 78.459                 | 0.989                     | 5.751           | 2.657          | 3.009              |
| 6      | CH <sub>2</sub> CH <sub>2</sub> CH <sub>2</sub> SnF <sub>2</sub>    | -15.287                  | -7.241                 | 6.633      | 72.733                 | 2.903                     | 4.085           | 2.421          | 6.237              |
| 7      | CH <sub>2</sub> CH <sub>2</sub> CH <sub>2</sub> SnCl <sub>2</sub>   | -14.361                  | -3.403                 | 6.840      | 47.156                 | 3.115                     | 3.327           | 2.533          | 4.255              |
| 8      | CH <sub>2</sub> CH <sub>2</sub> GeF <sub>2</sub> GeF <sub>2</sub>   | -14.971                  | -13.298                | 6.799      | 64.064                 | 2.876                     | 4.136           | 3.718          | 7.031              |
| 9      | CH <sub>2</sub> CH <sub>2</sub> GeCl <sub>2</sub> GeF <sub>2</sub>  | -14.103                  | -9.692                 | 6.787      | 50.725                 | 3.181                     | 3.771           | 3.625          | 6.097              |
| 10     | CH <sub>2</sub> CH <sub>2</sub> GeCl <sub>2</sub> GeCl <sub>2</sub> | -13.239                  | -6.104                 | 6.768      | 37.817                 | 3.472                     | 3.472           | 3.572          | 5.385              |

Continued on next page

\*To whom correspondence should be addressed

**Table 1 – continued from previous page**

| S. No. | System<br>Composition                                               | Atomization<br>Eng. (eV) | Formation<br>Eng. (eV) | $c$<br>(Å) | Spring<br>Const. (N/m) | Electron<br>Affinity (eV) | Bandgap<br>(eV) | $\epsilon_e^c$ | $\epsilon_{tot}^c$ |
|--------|---------------------------------------------------------------------|--------------------------|------------------------|------------|------------------------|---------------------------|-----------------|----------------|--------------------|
| 11     | CH <sub>2</sub> CH <sub>2</sub> SiF <sub>2</sub> GeF <sub>2</sub>   | -15.333                  | -13.821                | 6.034      | 82.760                 | 3.703                     | 3.549           | 2.351          | 5.722              |
| 12     | CH <sub>2</sub> CH <sub>2</sub> SiF <sub>2</sub> GeCl <sub>2</sub>  | -14.824                  | -11.648                | 6.589      | 56.452                 | 2.335                     | 4.463           | 3.095          | 4.673              |
| 13     | CH <sub>2</sub> CH <sub>2</sub> SiF <sub>2</sub> SiF <sub>2</sub>   | -16.405                  | -17.178                | 6.375      | 75.478                 | 1.921                     | 4.747           | 2.798          | 4.357              |
| 14     | CH <sub>2</sub> CH <sub>2</sub> SiCl <sub>2</sub> GeF <sub>2</sub>  | -14.566                  | -10.617                | 6.602      | 56.124                 | 2.202                     | 4.634           | 3.158          | 5.175              |
| 15     | CH <sub>2</sub> CH <sub>2</sub> SiCl <sub>2</sub> GeCl <sub>2</sub> | -13.704                  | -7.036                 | 6.598      | 42.589                 | 2.482                     | 4.228           | 3.118          | 4.537              |
| 16     | CH <sub>2</sub> CH <sub>2</sub> SiCl <sub>2</sub> SiF <sub>2</sub>  | -15.288                  | -12.579                | 6.398      | 60.970                 | 2.045                     | 4.651           | 2.831          | 3.851              |
| 17     | CH <sub>2</sub> CH <sub>2</sub> SiCl <sub>2</sub> SiCl <sub>2</sub> | -14.174                  | -7.988                 | 6.430      | 47.831                 | 2.127                     | 4.596           | 2.868          | 3.696              |
| 18     | CH <sub>2</sub> CH <sub>2</sub> SnF <sub>2</sub> GeF <sub>2</sub>   | -14.310                  | -11.306                | 6.564      | 72.692                 | 3.629                     | 2.792           | 3.097          | 12.404             |
| 19     | CH <sub>2</sub> CH <sub>2</sub> SnF <sub>2</sub> GeCl <sub>2</sub>  | -13.838                  | -9.284                 | 7.143      | 39.906                 | 3.933                     | 3.087           | 4.311          | 11.325             |
| 20     | CH <sub>2</sub> CH <sub>2</sub> SnF <sub>2</sub> SiF <sub>2</sub>   | -15.220                  | -14.019                | 6.316      | 90.172                 | 3.448                     | 3.718           | 2.592          | 5.002              |
| 21     | CH <sub>2</sub> CH <sub>2</sub> SnF <sub>2</sub> SiCl <sub>2</sub>  | -14.093                  | -9.378                 | 6.442      | 55.991                 | 3.282                     | 3.356           | 2.653          | 5.691              |
| 22     | CH <sub>2</sub> CH <sub>2</sub> SnF <sub>2</sub> SnF <sub>2</sub>   | -14.483                  | -12.649                | 6.634      | 50.568                 | 4.443                     | 2.980           | 4.271          | 10.462             |
| 23     | CH <sub>2</sub> CH <sub>2</sub> SnCl <sub>2</sub> GeF <sub>2</sub>  | -13.402                  | -7.539                 | 7.078      | 29.992                 | 4.549                     | 1.887           | 4.393          | 14.197             |
| 24     | CH <sub>2</sub> CH <sub>2</sub> SnCl <sub>2</sub> GeCl <sub>2</sub> | -12.547                  | -3.987                 | 7.436      | 18.494                 | 4.290                     | 2.115           | 3.571          | 7.884              |
| 25     | CH <sub>2</sub> CH <sub>2</sub> SnCl <sub>2</sub> SiF <sub>2</sub>  | -14.308                  | -10.238                | 6.337      | 57.206                 | 4.046                     | 2.924           | 2.762          | 4.322              |
| 26     | CH <sub>2</sub> CH <sub>2</sub> SnCl <sub>2</sub> SiCl <sub>2</sub> | -13.186                  | -5.615                 | 6.954      | 24.370                 | 3.549                     | 2.825           | 2.800          | 3.689              |
| 27     | CH <sub>2</sub> CH <sub>2</sub> SnCl <sub>2</sub> SnF <sub>2</sub>  | -13.658                  | -9.215                 | 7.508      | 32.349                 | 4.160                     | 2.698           | 5.064          | 12.843             |
| 28     | CH <sub>2</sub> CH <sub>2</sub> SnCl <sub>2</sub> SnCl <sub>2</sub> | -12.841                  | -5.816                 | 6.530      | 19.976                 | 4.211                     | 2.654           | 3.881          | 7.310              |
| 29     | CH <sub>2</sub> GeF <sub>2</sub> CH <sub>2</sub> GeF <sub>2</sub>   | -14.920                  | -13.096                | 6.673      | 79.125                 | 2.194                     | 5.298           | 2.998          | 5.400              |
| 30     | CH <sub>2</sub> GeF <sub>2</sub> CH <sub>2</sub> GeCl <sub>2</sub>  | -14.027                  | -9.388                 | 6.687      | 66.186                 | 2.211                     | 4.750           | 3.035          | 4.747              |
| 31     | CH <sub>2</sub> GeF <sub>2</sub> CH <sub>2</sub> SiF <sub>2</sub>   | -15.789                  | -15.645                | 6.473      | 82.387                 | 1.801                     | 5.595           | 2.799          | 4.701              |
| 32     | CH <sub>2</sub> GeF <sub>2</sub> CH <sub>2</sub> SiCl <sub>2</sub>  | -14.613                  | -10.804                | 6.516      | 72.823                 | 1.759                     | 5.303           | 2.900          | 4.375              |
| 33     | CH <sub>2</sub> GeF <sub>2</sub> CH <sub>2</sub> SnF <sub>2</sub>   | -14.609                  | -12.502                | 6.994      | 62.283                 | 2.911                     | 4.512           | 3.237          | 7.312              |
| 34     | CH <sub>2</sub> GeF <sub>2</sub> CH <sub>2</sub> SnCl <sub>2</sub>  | -13.804                  | -9.147                 | 6.988      | 35.223                 | 2.831                     | 4.132           | 3.182          | 5.750              |
| 35     | CH <sub>2</sub> GeF <sub>2</sub> GeF <sub>2</sub> GeF <sub>2</sub>  | -14.258                  | -18.423                | 7.676      | 56.586                 | 3.942                     | 3.326           | 4.412          | 11.746             |
| 36     | CH <sub>2</sub> GeF <sub>2</sub> GeCl <sub>2</sub> GeF <sub>2</sub> | -13.402                  | -14.864                | 7.628      | 46.998                 | 4.010                     | 3.129           | 4.102          | 9.916              |
| 37     | CH <sub>2</sub> GeF <sub>2</sub> SiF <sub>2</sub> GeF <sub>2</sub>  | -14.880                  | -19.980                | 7.454      | 61.181                 | 3.304                     | 3.815           | 3.702          | 8.073              |
| 38     | CH <sub>2</sub> GeF <sub>2</sub> SiCl <sub>2</sub> GeF <sub>2</sub> | -13.786                  | -15.472                | 7.439      | 49.641                 | 3.235                     | 3.743           | 3.560          | 6.897              |
| 39     | CH <sub>2</sub> GeF <sub>2</sub> SnF <sub>2</sub> GeF <sub>2</sub>  | -14.033                  | -18.174                | 7.925      | 45.859                 | 4.367                     | 3.070           | 4.742          | 14.836             |

Continued on next page

**Table 1 – continued from previous page**

| S. No. | System<br>Composition                                                 | Atomization<br>Eng. (eV) | Formation<br>Eng. (eV) | $c$<br>(Å) | Spring<br>Const. (N/m) | Electron<br>Affinity (eV) | Bandgap<br>(eV) | $\epsilon_e^c$ | $\epsilon_{tot}^c$ |
|--------|-----------------------------------------------------------------------|--------------------------|------------------------|------------|------------------------|---------------------------|-----------------|----------------|--------------------|
| 40     | CH <sub>2</sub> GeF <sub>2</sub> SnCl <sub>2</sub> GeF <sub>2</sub>   | -13.244                  | -14.886                | 7.925      | 38.551                 | 4.327                     | 2.893           | 4.449          | 11.600             |
| 41     | CH <sub>2</sub> GeCl <sub>2</sub> CH <sub>2</sub> GeCl <sub>2</sub>   | -13.084                  | -5.485                 | 6.809      | 56.452                 | 2.557                     | 3.992           | 3.268          | 4.494              |
| 42     | CH <sub>2</sub> GeCl <sub>2</sub> CH <sub>2</sub> SiF <sub>2</sub>    | -14.886                  | -11.896                | 6.503      | 69.929                 | 2.105                     | 4.825           | 2.862          | 4.174              |
| 43     | CH <sub>2</sub> GeCl <sub>2</sub> CH <sub>2</sub> SiCl <sub>2</sub>   | -13.654                  | -6.835                 | 6.660      | 49.536                 | 2.400                     | 4.168           | 3.149          | 4.198              |
| 44     | CH <sub>2</sub> GeCl <sub>2</sub> CH <sub>2</sub> SnF <sub>2</sub>    | -13.718                  | -8.805                 | 7.014      | 54.756                 | 2.782                     | 4.276           | 3.276          | 6.249              |
| 45     | CH <sub>2</sub> GeCl <sub>2</sub> CH <sub>2</sub> SnCl <sub>2</sub>   | -12.882                  | -5.326                 | 7.087      | 33.869                 | 2.956                     | 3.702           | 3.395          | 5.265              |
| 46     | CH <sub>2</sub> GeCl <sub>2</sub> GeF <sub>2</sub> GeF <sub>2</sub>   | -13.395                  | -14.837                | 7.658      | 46.155                 | 3.925                     | 3.087           | 4.258          | 9.924              |
| 47     | CH <sub>2</sub> GeCl <sub>2</sub> GeF <sub>2</sub> GeCl <sub>2</sub>  | -12.496                  | -11.107                | 7.686      | 37.864                 | 4.365                     | 2.739           | 4.320          | 8.422              |
| 48     | CH <sub>2</sub> GeCl <sub>2</sub> GeCl <sub>2</sub> GeF <sub>2</sub>  | -12.524                  | -11.220                | 7.606      | 35.626                 | 4.246                     | 2.925           | 3.991          | 8.703              |
| 49     | CH <sub>2</sub> GeCl <sub>2</sub> GeCl <sub>2</sub> GeCl <sub>2</sub> | -11.662                  | -7.636                 | 7.644      | 26.287                 | 4.285                     | 2.616           | 4.089          | 7.667              |
| 50     | CH <sub>2</sub> GeCl <sub>2</sub> SiF <sub>2</sub> GeF <sub>2</sub>   | -13.976                  | -16.234                | 7.453      | 49.444                 | 3.506                     | 3.638           | 3.598          | 6.936              |
| 51     | CH <sub>2</sub> GeCl <sub>2</sub> SiF <sub>2</sub> GeCl <sub>2</sub>  | -13.115                  | -12.654                | 7.500      | 42.592                 | 3.524                     | 3.305           | 3.690          | 6.854              |
| 52     | CH <sub>2</sub> GeCl <sub>2</sub> SiCl <sub>2</sub> GeF <sub>2</sub>  | -12.905                  | -11.814                | 7.437      | 39.213                 | 3.476                     | 3.554           | 3.498          | 6.310              |
| 53     | CH <sub>2</sub> GeCl <sub>2</sub> SiCl <sub>2</sub> GeCl <sub>2</sub> | -12.042                  | -8.230                 | 7.501      | 31.723                 | 3.567                     | 3.189           | 3.607          | 5.869              |
| 54     | CH <sub>2</sub> GeCl <sub>2</sub> SnF <sub>2</sub> GeF <sub>2</sub>   | -13.132                  | -14.437                | 7.941      | 37.823                 | 4.651                     | 2.761           | 4.671          | 11.688             |
| 55     | CH <sub>2</sub> GeCl <sub>2</sub> SnF <sub>2</sub> GeCl <sub>2</sub>  | -12.279                  | -10.890                | 7.964      | 29.785                 | 4.698                     | 2.442           | 4.710          | 10.227             |
| 56     | CH <sub>2</sub> GeCl <sub>2</sub> SnCl <sub>2</sub> GeF <sub>2</sub>  | -12.385                  | -11.312                | 7.927      | 28.751                 | 4.355                     | 2.640           | 4.388          | 10.885             |
| 57     | CH <sub>2</sub> GeCl <sub>2</sub> SnCl <sub>2</sub> GeCl <sub>2</sub> | -11.513                  | -7.691                 | 7.973      | 21.141                 | 4.585                     | 2.339           | 4.494          | 9.647              |
| 58     | CH <sub>2</sub> SiF <sub>2</sub> CH <sub>2</sub> SiF <sub>2</sub>     | -16.639                  | -18.116                | 6.267      | 92.244                 | 1.328                     | 5.962           | 2.545          | 3.988              |
| 59     | CH <sub>2</sub> SiF <sub>2</sub> CH <sub>2</sub> SiCl <sub>2</sub>    | -15.456                  | -13.251                | 6.328      | 79.297                 | 1.234                     | 5.793           | 2.682          | 3.908              |
| 60     | CH <sub>2</sub> SiF <sub>2</sub> CH <sub>2</sub> SnF <sub>2</sub>     | -15.479                  | -15.055                | 6.783      | 63.446                 | 2.694                     | 4.570           | 3.071          | 5.961              |
| 61     | CH <sub>2</sub> SiF <sub>2</sub> CH <sub>2</sub> SnCl <sub>2</sub>    | -14.667                  | -11.673                | 6.797      | 40.088                 | 2.727                     | 4.168           | 3.038          | 4.827              |
| 62     | CH <sub>2</sub> SiF <sub>2</sub> GeF <sub>2</sub> GeF <sub>2</sub>    | -15.022                  | -20.549                | 7.441      | 59.864                 | 3.392                     | 3.761           | 3.808          | 9.568              |
| 63     | CH <sub>2</sub> SiF <sub>2</sub> GeF <sub>2</sub> GeCl <sub>2</sub>   | -14.150                  | -16.928                | 7.446      | 48.643                 | 3.519                     | 3.436           | 3.712          | 7.342              |
| 64     | CH <sub>2</sub> SiF <sub>2</sub> GeF <sub>2</sub> SiF <sub>2</sub>    | -15.756                  | -22.560                | 7.208      | 64.278                 | 3.000                     | 4.123           | 3.251          | 8.375              |
| 65     | CH <sub>2</sub> SiF <sub>2</sub> GeCl <sub>2</sub> GeF <sub>2</sub>   | -14.171                  | -17.012                | 7.412      | 48.796                 | 3.400                     | 3.572           | 3.613          | 7.432              |
| 66     | CH <sub>2</sub> SiF <sub>2</sub> GeCl <sub>2</sub> GeCl <sub>2</sub>  | -13.299                  | -13.393                | 7.413      | 39.097                 | 3.596                     | 3.254           | 3.552          | 6.648              |
| 67     | CH <sub>2</sub> SiF <sub>2</sub> GeCl <sub>2</sub> SiF <sub>2</sub>   | -14.913                  | -19.051                | 7.196      | 53.591                 | 2.945                     | 4.020           | 3.151          | 5.797              |
| 68     | CH <sub>2</sub> SiF <sub>2</sub> SiF <sub>2</sub> GeF <sub>2</sub>    | -15.644                  | -22.111                | 7.217      | 64.217                 | 3.123                     | 3.896           | 3.368          | 6.324              |

Continued on next page

**Table 1 – continued from previous page**

| S. No. | System<br>Composition                                                 | Atomization<br>Eng. (eV) | Formation<br>Eng. (eV) | $c$<br>(Å) | Spring<br>Const. (N/m) | Electron<br>Affinity (eV) | Bandgap<br>(eV) | $\epsilon_e^c$ | $\epsilon_{tot}^c$ |
|--------|-----------------------------------------------------------------------|--------------------------|------------------------|------------|------------------------|---------------------------|-----------------|----------------|--------------------|
| 69     | CH <sub>2</sub> SiF <sub>2</sub> SiF <sub>2</sub> GeCl <sub>2</sub>   | -14.776                  | -18.505                | 7.233      | 53.375                 | 3.031                     | 3.729           | 3.309          | 5.872              |
| 70     | CH <sub>2</sub> SiF <sub>2</sub> SiF <sub>2</sub> SiF <sub>2</sub>    | -16.378                  | -24.119                | 6.974      | 69.059                 | 2.850                     | 3.937           | 3.003          | 6.149              |
| 71     | CH <sub>2</sub> SiF <sub>2</sub> SiCl <sub>2</sub> GeF <sub>2</sub>   | -14.556                  | -17.626                | 7.215      | 52.693                 | 3.018                     | 3.871           | 3.269          | 6.046              |
| 72     | CH <sub>2</sub> SiF <sub>2</sub> SiCl <sub>2</sub> GeCl <sub>2</sub>  | -13.688                  | -14.021                | 7.236      | 42.667                 | 3.096                     | 3.658           | 3.233          | 5.327              |
| 73     | CH <sub>2</sub> SiF <sub>2</sub> SiCl <sub>2</sub> SiF <sub>2</sub>   | -15.301                  | -19.678                | 6.986      | 57.007                 | 2.775                     | 3.944           | 2.954          | 4.856              |
| 74     | CH <sub>2</sub> SiF <sub>2</sub> SnF <sub>2</sub> GeF <sub>2</sub>    | -14.775                  | -20.214                | 7.677      | 48.668                 | 3.699                     | 3.540           | 4.061          | 13.731             |
| 75     | CH <sub>2</sub> SiF <sub>2</sub> SnF <sub>2</sub> GeCl <sub>2</sub>   | -13.908                  | -16.612                | 7.697      | 40.433                 | 3.913                     | 3.142           | 4.002          | 11.815             |
| 76     | CH <sub>2</sub> SiF <sub>2</sub> SnF <sub>2</sub> SiF <sub>2</sub>    | -15.225                  | -21.087                | 6.940      | 73.938                 | 3.494                     | 3.231           | 2.559          | 11.149             |
| 77     | CH <sub>2</sub> SiF <sub>2</sub> SnCl <sub>2</sub> GeF <sub>2</sub>   | -13.989                  | -16.938                | 7.686      | 41.027                 | 3.734                     | 3.314           | 3.871          | 9.267              |
| 78     | CH <sub>2</sub> SiF <sub>2</sub> SnCl <sub>2</sub> GeCl <sub>2</sub>  | -13.124                  | -13.342                | 7.723      | 30.731                 | 3.943                     | 2.960           | 3.858          | 8.435              |
| 79     | CH <sub>2</sub> SiF <sub>2</sub> SnCl <sub>2</sub> SiF <sub>2</sub>   | -14.706                  | -18.878                | 7.457      | 44.417                 | 3.152                     | 3.764           | 3.329          | 7.192              |
| 80     | CH <sub>2</sub> SiCl <sub>2</sub> CH <sub>2</sub> SiCl <sub>2</sub>   | -14.206                  | -8.115                 | 6.521      | 70.474                 | 1.562                     | 5.027           | 2.980          | 3.800              |
| 81     | CH <sub>2</sub> SiCl <sub>2</sub> CH <sub>2</sub> SnF <sub>2</sub>    | -14.313                  | -10.257                | 6.826      | 56.678                 | 2.624                     | 4.447           | 3.153          | 5.671              |
| 82     | CH <sub>2</sub> SiCl <sub>2</sub> CH <sub>2</sub> SnCl <sub>2</sub>   | -13.467                  | -6.739                 | 6.925      | 37.900                 | 2.913                     | 3.796           | 3.299          | 4.848              |
| 83     | CH <sub>2</sub> SiCl <sub>2</sub> GeF <sub>2</sub> GeF <sub>2</sub>   | -13.898                  | -15.919                | 7.450      | 49.524                 | 3.373                     | 3.565           | 3.786          | 8.398              |
| 84     | CH <sub>2</sub> SiCl <sub>2</sub> GeF <sub>2</sub> GeCl <sub>2</sub>  | -13.007                  | -12.223                | 7.495      | 41.202                 | 3.731                     | 3.111           | 3.873          | 8.693              |
| 85     | CH <sub>2</sub> SiCl <sub>2</sub> GeF <sub>2</sub> SiF <sub>2</sub>   | -14.628                  | -17.914                | 7.230      | 54.609                 | 2.904                     | 3.997           | 3.266          | 7.675              |
| 86     | CH <sub>2</sub> SiCl <sub>2</sub> GeF <sub>2</sub> SiCl <sub>2</sub>  | -13.454                  | -13.083                | 7.319      | 46.081                 | 3.284                     | 3.642           | 3.440          | 6.036              |
| 87     | CH <sub>2</sub> SiCl <sub>2</sub> GeCl <sub>2</sub> GeF <sub>2</sub>  | -13.027                  | -12.304                | 7.423      | 38.696                 | 3.723                     | 3.367           | 3.630          | 7.390              |
| 88     | CH <sub>2</sub> SiCl <sub>2</sub> GeCl <sub>2</sub> GeCl <sub>2</sub> | -12.157                  | -8.688                 | 7.484      | 29.960                 | 3.905                     | 2.933           | 3.748          | 6.528              |
| 89     | CH <sub>2</sub> SiCl <sub>2</sub> GeCl <sub>2</sub> SiF <sub>2</sub>  | -13.759                  | -14.305                | 7.236      | 42.525                 | 3.023                     | 3.937           | 3.194          | 5.667              |
| 90     | CH <sub>2</sub> SiCl <sub>2</sub> GeCl <sub>2</sub> SiCl <sub>2</sub> | -12.633                  | -9.667                 | 7.327      | 34.373                 | 3.284                     | 3.488           | 3.368          | 5.475              |
| 91     | CH <sub>2</sub> SiCl <sub>2</sub> SiF <sub>2</sub> GeF <sub>2</sub>   | -14.475                  | -17.301                | 7.239      | 53.414                 | 3.169                     | 3.785           | 3.343          | 6.104              |
| 92     | CH <sub>2</sub> SiCl <sub>2</sub> SiF <sub>2</sub> GeCl <sub>2</sub>  | -13.607                  | -13.693                | 7.317      | 45.688                 | 3.268                     | 3.441           | 3.447          | 5.739              |
| 93     | CH <sub>2</sub> SiCl <sub>2</sub> SiF <sub>2</sub> SiF <sub>2</sub>   | -15.196                  | -19.257                | 7.016      | 57.956                 | 2.851                     | 3.856           | 3.016          | 5.449              |
| 94     | CH <sub>2</sub> SiCl <sub>2</sub> SiF <sub>2</sub> SiCl <sub>2</sub>  | -14.112                  | -14.789                | 7.138      | 50.879                 | 2.930                     | 3.599           | 3.180          | 5.539              |
| 95     | CH <sub>2</sub> SiCl <sub>2</sub> SiCl <sub>2</sub> GeF <sub>2</sub>  | -13.434                  | -13.004                | 7.249      | 42.940                 | 3.001                     | 3.749           | 3.288          | 5.774              |
| 96     | CH <sub>2</sub> SiCl <sub>2</sub> SiCl <sub>2</sub> GeCl <sub>2</sub> | -12.547                  | -9.320                 | 7.346      | 34.230                 | 3.339                     | 3.335           | 3.412          | 5.240              |
| 97     | CH <sub>2</sub> SiCl <sub>2</sub> SiCl <sub>2</sub> SiF <sub>2</sub>  | -14.179                  | -15.057                | 7.051      | 46.128                 | 2.755                     | 3.873           | 2.991          | 4.762              |

Continued on next page

**Table 1 – continued from previous page**

| S. No. | System<br>Composition                                                 | Atomization<br>Eng. (eV) | Formation<br>Eng. (eV) | $c$<br>(Å) | Spring<br>Const. (N/m) | Electron<br>Affinity (eV) | Bandgap<br>(eV) | $\epsilon_e^c$ | $\epsilon_{tot}^c$ |
|--------|-----------------------------------------------------------------------|--------------------------|------------------------|------------|------------------------|---------------------------|-----------------|----------------|--------------------|
| 98     | CH <sub>2</sub> SiCl <sub>2</sub> SiCl <sub>2</sub> SiCl <sub>2</sub> | -13.031                  | -10.332                | 7.205      | 38.797                 | 2.993                     | 3.586           | 3.169          | 4.615              |
| 99     | CH <sub>2</sub> SiCl <sub>2</sub> SnF <sub>2</sub> GeF <sub>2</sub>   | -13.660                  | -15.621                | 7.715      | 40.337                 | 3.819                     | 3.250           | 4.096          | 13.130             |
| 100    | CH <sub>2</sub> SiCl <sub>2</sub> SnF <sub>2</sub> GeCl <sub>2</sub>  | -12.779                  | -11.963                | 7.766      | 33.489                 | 4.140                     | 2.798           | 4.174          | 9.601              |
| 101    | CH <sub>2</sub> SiCl <sub>2</sub> SnF <sub>2</sub> SiF <sub>2</sub>   | -14.365                  | -17.512                | 7.465      | 44.024                 | 3.138                     | 3.796           | 3.454          | 9.162              |
| 102    | CH <sub>2</sub> SiCl <sub>2</sub> SnF <sub>2</sub> SiCl <sub>2</sub>  | -13.235                  | -12.860                | 7.564      | 36.483                 | 3.514                     | 3.339           | 3.628          | 9.142              |
| 103    | CH <sub>2</sub> SiCl <sub>2</sub> SnCl <sub>2</sub> GeF <sub>2</sub>  | -12.874                  | -12.341                | 7.733      | 31.461                 | 3.871                     | 3.044           | 3.949          | 8.927              |
| 104    | CH <sub>2</sub> SiCl <sub>2</sub> SnCl <sub>2</sub> GeCl <sub>2</sub> | -11.994                  | -8.687                 | 7.819      | 23.154                 | 4.221                     | 2.635           | 4.079          | 7.972              |
| 105    | CH <sub>2</sub> SiCl <sub>2</sub> SnCl <sub>2</sub> SiF <sub>2</sub>  | -13.588                  | -14.272                | 7.516      | 33.607                 | 3.257                     | 3.535           | 3.395          | 7.085              |
| 106    | CH <sub>2</sub> SiCl <sub>2</sub> SnCl <sub>2</sub> SiCl <sub>2</sub> | -12.455                  | -9.607                 | 7.658      | 26.309                 | 3.668                     | 3.097           | 3.608          | 6.696              |
| 107    | CH <sub>2</sub> SnF <sub>2</sub> CH <sub>2</sub> SnF <sub>2</sub>     | -14.280                  | -11.838                | 7.302      | 59.068                 | 3.221                     | 4.136           | 3.439          | 9.184              |
| 108    | CH <sub>2</sub> SnF <sub>2</sub> CH <sub>2</sub> SnCl <sub>2</sub>    | -13.480                  | -8.506                 | 7.317      | 47.802                 | 3.117                     | 3.910           | 3.395          | 7.346              |
| 109    | CH <sub>2</sub> SnF <sub>2</sub> GeF <sub>2</sub> GeF <sub>2</sub>    | -13.986                  | -17.985                | 7.926      | 35.519                 | 4.331                     | 3.068           | 4.723          | 17.386             |
| 110    | CH <sub>2</sub> SnF <sub>2</sub> GeF <sub>2</sub> GeCl <sub>2</sub>   | -13.131                  | -14.432                | 7.942      | 37.161                 | 4.239                     | 2.840           | 4.675          | 15.646             |
| 111    | CH <sub>2</sub> SnF <sub>2</sub> GeF <sub>2</sub> SiF <sub>2</sub>    | -14.748                  | -20.106                | 7.680      | 40.149                 | 3.827                     | 3.396           | 4.155          | 11.500             |
| 112    | CH <sub>2</sub> SnF <sub>2</sub> GeF <sub>2</sub> SiCl <sub>2</sub>   | -13.636                  | -15.525                | 7.709      | 36.393                 | 3.800                     | 3.202           | 4.196          | 11.959             |
| 113    | CH <sub>2</sub> SnF <sub>2</sub> GeF <sub>2</sub> SnF <sub>2</sub>    | -13.713                  | -17.547                | 8.250      | 43.442                 | 4.595                     | 2.774           | 5.229          | 21.613             |
| 114    | CH <sub>2</sub> SnF <sub>2</sub> GeCl <sub>2</sub> GeF <sub>2</sub>   | -13.136                  | -14.450                | 7.900      | 36.547                 | 4.390                     | 2.812           | 4.433          | 14.291             |
| 115    | CH <sub>2</sub> SnF <sub>2</sub> GeCl <sub>2</sub> GeCl <sub>2</sub>  | -12.282                  | -10.903                | 7.929      | 28.675                 | 4.339                     | 2.636           | 4.432          | 11.775             |
| 116    | CH <sub>2</sub> SnF <sub>2</sub> GeCl <sub>2</sub> SiF <sub>2</sub>   | -13.905                  | -16.602                | 7.679      | 33.652                 | 3.957                     | 3.108           | 3.972          | 10.783             |
| 117    | CH <sub>2</sub> SnF <sub>2</sub> GeCl <sub>2</sub> SiCl <sub>2</sub>  | -12.793                  | -12.017                | 7.725      | 30.397                 | 3.954                     | 2.934           | 4.049          | 10.533             |
| 118    | CH <sub>2</sub> SnF <sub>2</sub> GeCl <sub>2</sub> SnF <sub>2</sub>   | -12.868                  | -14.031                | 8.241      | 35.570                 | 4.654                     | 2.531           | 4.910          | 17.737             |
| 119    | CH <sub>2</sub> SnF <sub>2</sub> SiF <sub>2</sub> GeF <sub>2</sub>    | -14.845                  | -20.495                | 7.690      | 41.216                 | 3.424                     | 3.623           | 3.939          | 10.551             |
| 120    | CH <sub>2</sub> SnF <sub>2</sub> SiF <sub>2</sub> GeCl <sub>2</sub>   | -13.680                  | -15.702                | 7.707      | 37.090                 | 3.598                     | 3.464           | 3.884          | 9.210              |
| 121    | CH <sub>2</sub> SnF <sub>2</sub> SiF <sub>2</sub> SiF <sub>2</sub>    | -15.254                  | -21.205                | 7.427      | 43.901                 | 3.393                     | 3.684           | 3.650          | 8.092              |
| 122    | CH <sub>2</sub> SnF <sub>2</sub> SiF <sub>2</sub> SiCl <sub>2</sub>   | -14.174                  | -16.751                | 7.466      | 42.412                 | 3.294                     | 3.587           | 3.637          | 8.725              |
| 123    | CH <sub>2</sub> SnF <sub>2</sub> SiF <sub>2</sub> SnF <sub>2</sub>    | -14.208                  | -18.597                | 7.992      | 47.277                 | 3.888                     | 3.370           | 4.270          | 14.685             |
| 124    | CH <sub>2</sub> SnF <sub>2</sub> SiCl <sub>2</sub> GeF <sub>2</sub>   | -13.449                  | -14.777                | 7.695      | 39.620                 | 3.778                     | 3.442           | 3.794          | 8.929              |
| 125    | CH <sub>2</sub> SnF <sub>2</sub> SiCl <sub>2</sub> GeCl <sub>2</sub>  | -12.620                  | -11.328                | 7.733      | 32.494                 | 3.705                     | 3.263           | 3.794          | 7.811              |
| 126    | CH <sub>2</sub> SnF <sub>2</sub> SiCl <sub>2</sub> SiF <sub>2</sub>   | -14.206                  | -16.878                | 7.457      | 40.966                 | 3.423                     | 3.551           | 3.542          | 9.181              |

Continued on next page

**Table 1 – continued from previous page**

| S. No. | System<br>Composition                                                 | Atomization<br>Eng. (eV) | Formation<br>Eng. (eV) | $c$<br>(Å) | Spring<br>Const. (N/m) | Electron<br>Affinity (eV) | Bandgap<br>(eV) | $\epsilon_e^c$ | $\epsilon_{tot}^c$ |
|--------|-----------------------------------------------------------------------|--------------------------|------------------------|------------|------------------------|---------------------------|-----------------|----------------|--------------------|
| 127    | CH <sub>2</sub> SnF <sub>2</sub> SiCl <sub>2</sub> SiCl <sub>2</sub>  | -13.124                  | -12.415                | 7.518      | 33.954                 | 3.415                     | 3.416           | 3.577          | 7.258              |
| 128    | CH <sub>2</sub> SnF <sub>2</sub> SiCl <sub>2</sub> SnF <sub>2</sub>   | -13.156                  | -14.257                | 8.012      | 38.008                 | 3.967                     | 3.144           | 4.113          | 12.108             |
| 129    | CH <sub>2</sub> SnF <sub>2</sub> SnF <sub>2</sub> GeF <sub>2</sub>    | -13.687                  | -17.443                | 8.133      | 36.344                 | 4.798                     | 2.880           | 4.969          | 26.035             |
| 130    | CH <sub>2</sub> SnF <sub>2</sub> SnF <sub>2</sub> GeCl <sub>2</sub>   | -12.864                  | -14.014                | 8.176      | 30.293                 | 4.721                     | 2.616           | 4.994          | 18.353             |
| 131    | CH <sub>2</sub> SnF <sub>2</sub> SnF <sub>2</sub> SiF <sub>2</sub>    | -14.506                  | -19.792                | 7.856      | 34.048                 | 4.129                     | 3.165           | 4.344          | 16.692             |
| 132    | CH <sub>2</sub> SnF <sub>2</sub> SnF <sub>2</sub> SiCl <sub>2</sub>   | -13.406                  | -15.256                | 7.927      | 31.696                 | 4.108                     | 2.982           | 4.432          | 18.173             |
| 133    | CH <sub>2</sub> SnF <sub>2</sub> SnF <sub>2</sub> SnF <sub>2</sub>    | -13.504                  | -17.364                | 8.425      | 37.711                 | 4.839                     | 2.649           | 5.373          | 46.935             |
| 134    | CH <sub>2</sub> SnF <sub>2</sub> SnCl <sub>2</sub> GeF <sub>2</sub>   | -12.986                  | -14.504                | 8.161      | 30.581                 | 4.595                     | 2.682           | 4.710          | 17.853             |
| 135    | CH <sub>2</sub> SnF <sub>2</sub> SnCl <sub>2</sub> GeCl <sub>2</sub>  | -12.138                  | -10.979                | 8.235      | 25.579                 | 4.584                     | 2.451           | 4.831          | 14.457             |
| 136    | CH <sub>2</sub> SnF <sub>2</sub> SnCl <sub>2</sub> SiF <sub>2</sub>   | -13.732                  | -16.559                | 7.905      | 29.954                 | 4.115                     | 2.981           | 4.158          | 16.621             |
| 137    | CH <sub>2</sub> SnF <sub>2</sub> SnCl <sub>2</sub> SiCl <sub>2</sub>  | -12.629                  | -12.016                | 7.999      | 25.607                 | 4.177                     | 2.762           | 4.333          | 11.361             |
| 138    | CH <sub>2</sub> SnF <sub>2</sub> SnCl <sub>2</sub> SnF <sub>2</sub>   | -12.727                  | -14.119                | 8.460      | 31.300                 | 4.798                     | 2.479           | 5.099          | 26.252             |
| 139    | CH <sub>2</sub> SnCl <sub>2</sub> CH <sub>2</sub> SnCl <sub>2</sub>   | -12.658                  | -5.085                 | 7.403      | 39.872                 | 3.250                     | 3.542           | 3.520          | 6.100              |
| 140    | CH <sub>2</sub> SnCl <sub>2</sub> GeF <sub>2</sub> GeF <sub>2</sub>   | -13.202                  | -14.717                | 7.939      | 32.370                 | 4.248                     | 2.860           | 4.540          | 14.382             |
| 141    | CH <sub>2</sub> SnCl <sub>2</sub> GeF <sub>2</sub> GeCl <sub>2</sub>  | -12.330                  | -11.095                | 7.989      | 28.298                 | 4.341                     | 2.581           | 4.647          | 11.044             |
| 142    | CH <sub>2</sub> SnCl <sub>2</sub> GeF <sub>2</sub> SiF <sub>2</sub>   | -13.955                  | -16.801                | 7.708      | 35.790                 | 3.878                     | 3.140           | 4.017          | 9.317              |
| 143    | CH <sub>2</sub> SnCl <sub>2</sub> GeF <sub>2</sub> SiCl <sub>2</sub>  | -12.830                  | -12.166                | 7.778      | 31.611                 | 4.008                     | 2.875           | 4.192          | 8.715              |
| 144    | CH <sub>2</sub> SnCl <sub>2</sub> GeF <sub>2</sub> SnF <sub>2</sub>   | -12.933                  | -14.293                | 8.267      | 32.145                 | 4.462                     | 2.632           | 5.021          | 19.525             |
| 145    | CH <sub>2</sub> SnCl <sub>2</sub> GeF <sub>2</sub> SnCl <sub>2</sub>  | -12.139                  | -10.984                | 8.335      | 26.478                 | 4.537                     | 2.400           | 5.050          | 13.681             |
| 146    | CH <sub>2</sub> SnCl <sub>2</sub> GeCl <sub>2</sub> GeF <sub>2</sub>  | -12.350                  | -11.175                | 7.917      | 28.922                 | 4.324                     | 2.666           | 4.298          | 10.148             |
| 147    | CH <sub>2</sub> SnCl <sub>2</sub> GeCl <sub>2</sub> GeCl <sub>2</sub> | -11.482                  | -7.570                 | 7.981      | 22.235                 | 4.471                     | 2.405           | 4.452          | 9.782              |
| 148    | CH <sub>2</sub> SnCl <sub>2</sub> GeCl <sub>2</sub> SiF <sub>2</sub>  | -13.111                  | -13.290                | 7.714      | 31.091                 | 3.967                     | 2.900           | 3.877          | 8.006              |
| 149    | CH <sub>2</sub> SnCl <sub>2</sub> GeCl <sub>2</sub> SiCl <sub>2</sub> | -11.985                  | -8.654                 | 7.804      | 23.517                 | 4.180                     | 2.645           | 4.095          | 8.055              |
| 150    | CH <sub>2</sub> SnCl <sub>2</sub> GeCl <sub>2</sub> SnF <sub>2</sub>  | -12.086                  | -10.771                | 8.267      | 27.515                 | 4.581                     | 2.411           | 4.780          | 13.973             |
| 151    | CH <sub>2</sub> SnCl <sub>2</sub> GeCl <sub>2</sub> SnCl <sub>2</sub> | -11.292                  | -7.460                 | 8.350      | 19.323                 | 4.681                     | 2.210           | 4.858          | 12.383             |
| 152    | CH <sub>2</sub> SnCl <sub>2</sub> SiF <sub>2</sub> GeF <sub>2</sub>   | -13.804                  | -16.196                | 7.709      | 36.031                 | 3.441                     | 3.416           | 3.805          | 9.841              |
| 153    | CH <sub>2</sub> SnCl <sub>2</sub> SiF <sub>2</sub> GeCl <sub>2</sub>  | -12.936                  | -12.590                | 7.786      | 33.107                 | 3.541                     | 3.138           | 3.927          | 7.876              |
| 154    | CH <sub>2</sub> SnCl <sub>2</sub> SiF <sub>2</sub> SiF <sub>2</sub>   | -14.561                  | -18.295                | 7.472      | 38.884                 | 3.246                     | 3.488           | 3.539          | 7.109              |
| 155    | CH <sub>2</sub> SnCl <sub>2</sub> SiF <sub>2</sub> SiCl <sub>2</sub>  | -13.440                  | -13.679                | 7.572      | 32.313                 | 3.378                     | 3.264           | 3.699          | 6.879              |

Continued on next page

**Table 1 – continued from previous page**

| S. No. | System<br>Composition                                                 | Atomization<br>Eng. (eV) | Formation<br>Eng. (eV) | $c$<br>(Å) | Spring<br>Const. (N/m) | Electron<br>Affinity (eV) | Bandgap<br>(eV) | $\epsilon_e^c$ | $\epsilon_{tot}^c$ |
|--------|-----------------------------------------------------------------------|--------------------------|------------------------|------------|------------------------|---------------------------|-----------------|----------------|--------------------|
| 156    | CH <sub>2</sub> SnCl <sub>2</sub> SiF <sub>2</sub> SnF <sub>2</sub>   | -13.514                  | -15.689                | 8.032      | 34.977                 | 3.637                     | 3.197           | 4.160          | 12.590             |
| 157    | CH <sub>2</sub> SnCl <sub>2</sub> SiF <sub>2</sub> SnCl <sub>2</sub>  | -12.839                  | -12.856                | 8.115      | 30.235                 | 3.761                     | 2.947           | 4.198          | 10.465             |
| 158    | CH <sub>2</sub> SnCl <sub>2</sub> SiCl <sub>2</sub> GeF <sub>2</sub>  | -12.718                  | -11.718                | 7.724      | 31.893                 | 3.584                     | 3.233           | 3.709          | 7.854              |
| 159    | CH <sub>2</sub> SnCl <sub>2</sub> SiCl <sub>2</sub> GeCl <sub>2</sub> | -11.868                  | -8.183                 | 7.829      | 24.802                 | 3.797                     | 2.938           | 3.869          | 7.050              |
| 160    | CH <sub>2</sub> SnCl <sub>2</sub> SiCl <sub>2</sub> SiF <sub>2</sub>  | -13.484                  | -13.854                | 7.516      | 33.500                 | 3.407                     | 3.314           | 3.478          | 6.347              |
| 161    | CH <sub>2</sub> SnCl <sub>2</sub> SiCl <sub>2</sub> SiCl <sub>2</sub> | -12.359                  | -9.222                 | 7.660      | 25.568                 | 3.615                     | 3.039           | 3.681          | 6.142              |
| 162    | CH <sub>2</sub> SnCl <sub>2</sub> SiCl <sub>2</sub> SnF <sub>2</sub>  | -12.436                  | -11.244                | 8.068      | 29.895                 | 3.846                     | 2.981           | 4.054          | 10.278             |
| 163    | CH <sub>2</sub> SnCl <sub>2</sub> SiCl <sub>2</sub> SnCl <sub>2</sub> | -11.637                  | -7.911                 | 8.187      | 21.925                 | 4.027                     | 2.711           | 4.164          | 8.899              |
| 164    | CH <sub>2</sub> SnCl <sub>2</sub> SnF <sub>2</sub> GeF <sub>2</sub>   | -12.932                  | -14.288                | 8.162      | 30.773                 | 4.686                     | 2.651           | 4.814          | 16.440             |
| 165    | CH <sub>2</sub> SnCl <sub>2</sub> SnF <sub>2</sub> GeCl <sub>2</sub>  | -12.093                  | -10.797                | 8.240      | 24.574                 | 4.755                     | 2.359           | 4.993          | 17.291             |
| 166    | CH <sub>2</sub> SnCl <sub>2</sub> SnF <sub>2</sub> SiF <sub>2</sub>   | -13.648                  | -16.225                | 7.923      | 30.200                 | 4.213                     | 2.941           | 4.239          | 15.408             |
| 167    | CH <sub>2</sub> SnCl <sub>2</sub> SnF <sub>2</sub> SiCl <sub>2</sub>  | -12.563                  | -11.752                | 8.018      | 24.735                 | 4.325                     | 2.665           | 4.461          | 15.522             |
| 168    | CH <sub>2</sub> SnCl <sub>2</sub> SnF <sub>2</sub> SnF <sub>2</sub>   | -12.669                  | -13.886                | 8.477      | 27.824                 | 4.830                     | 2.477           | 5.273          | 26.640             |
| 169    | CH <sub>2</sub> SnCl <sub>2</sub> SnF <sub>2</sub> SnCl <sub>2</sub>  | -11.907                  | -10.705                | 8.578      | 20.062                 | 4.865                     | 2.252           | 5.370          | 18.882             |
| 170    | CH <sub>2</sub> SnCl <sub>2</sub> SnCl <sub>2</sub> GeF <sub>2</sub>  | -12.171                  | -11.110                | 8.211      | 23.148                 | 4.622                     | 2.497           | 4.651          | 12.724             |
| 171    | CH <sub>2</sub> SnCl <sub>2</sub> SnCl <sub>2</sub> GeCl <sub>2</sub> | -11.335                  | -7.630                 | 8.336      | 17.001                 | 4.754                     | 2.191           | 4.926          | 11.598             |
| 172    | CH <sub>2</sub> SnCl <sub>2</sub> SnCl <sub>2</sub> SiF <sub>2</sub>  | -12.900                  | -13.100                | 7.983      | 25.628                 | 4.214                     | 2.751           | 4.124          | 10.569             |
| 173    | CH <sub>2</sub> SnCl <sub>2</sub> SnCl <sub>2</sub> SiCl <sub>2</sub> | -11.819                  | -8.643                 | 8.173      | 17.943                 | 4.465                     | 2.415           | 4.520          | 9.889              |
| 174    | CH <sub>2</sub> SnCl <sub>2</sub> SnCl <sub>2</sub> SnF <sub>2</sub>  | -11.914                  | -10.734                | 8.543      | 22.300                 | 4.813                     | 2.312           | 5.105          | 17.139             |
| 175    | CH <sub>2</sub> SnCl <sub>2</sub> SnCl <sub>2</sub> SnCl <sub>2</sub> | -11.154                  | -7.562                 | 8.703      | 15.242                 | 4.909                     | 2.051           | 5.367          | 14.355             |
